# Supplementary material for: Using Clickers in Nonmajors- and Majors-Level Biology Courses: Student Opinion, Learning, and Long-Term Retention of Course Material
Source: Atypon-hosted journal article supplement (doi:10.1187/cbe.07-08-0060), 2008-03-01
Supplement: suppd.pdf [file suppd.pdf]

## **Student Opinion Survey:**

### **Student Response Systems**

We are conducting a study of how student response systems (a.k.a. clickers) impact teaching and student learning. We would appreciate your participation in this study, as it will assist us in making recommendations for improving the teaching of students throughout the UWW campus.

If you agree to be in this study, you will be asked to fill out a survey and to answer several questions about your experience in using clickers. The survey should take 5-10 minutes to complete. There are no known risks associated with your being in the study. Possible benefits are that you will have a voice in helping shape the instruction that students on the UWW campus receive.

The questionnaire you fill out will be treated confidentially. PLEASE DO NOT PUT YOUR NAME ANYWHERE ON THE SURVEY. There will be no way to link you to your responses. Data from this study will be shared with your classmates and teacher and may be published in professional journals. Only grouped data will be presented or published.

You do not have to be in the study. You can withdraw from this study during filling out the questionnaire for any reason. There is no penalty for withdrawing.

Once the study is completed, we would be glad to give the results to you. In the meantime, if you have any questions, please contact:

Kirsten Crossgrove  
Department of Biological Sciences  
University of Wisconsin-Whitewater  
800 West Main Street  
Whitewater, WI 53190  
Telephone: 262-472-1678  
Fax: 262-472-5633  
E-Mail: [crossgrk@uww.edu](mailto:crossgrk@uww.edu)

Or

Kristen Curran  
Department of Biological Sciences  
University of Wisconsin-Whitewater  
800 West Main Street  
Whitewater, WI 53190  
Telephone: 262-472-5144  
Fax: 262-472-5633  
E-Mail: [currank@uww.edu](mailto:currank@uww.edu)

**If you have any complaints about your experience as a participant in this study, please call or write:**

Denise Ehlen, IRB Administrator

Office of Research and Sponsored Programs  
University of Wisconsin-Whitewater  
800 West Main Street  
Whitewater, WI 53190  
Telephone: 262-472-5212  
Fax: 262-472-5214  
E-Mail: ehrend@uww.edu

Although Ms. Ehlen will ask your name, all complaints are kept in confidence.

This research project has been approved by the University of Wisconsin-Whitewater Institutional Review Board for the Protection of Human Subjects for a one year period.

## STUDENT SURVEY

Filling out this survey indicates that I am at least 18 years old and that I am giving my informed consent to be a subject in this study.

---

Course Number, Course Name, Date, Time and Location:

---

Student ID

### Demographics

*Please indicate with an "X" which of the following best describes yourself*

Age:

17 - 19 \_\_\_\_\_

20 - 22 \_\_\_\_\_

23 - 25 \_\_\_\_\_

25+ \_\_\_\_\_

Gender:

Male \_\_\_\_\_

Female \_\_\_\_\_

Race:

African American \_\_\_\_\_

Latino \_\_\_\_\_

Asian \_\_\_\_\_

European American/Caucasian \_\_\_\_\_

Other: Please identify \_\_\_\_\_

Marital Status:

Single \_\_\_\_\_

Married \_\_\_\_\_

Divorced/Separated \_\_\_\_\_

Student Status:

Full-time \_\_\_\_\_

Part-time \_\_\_\_\_

Education Level:

Freshman \_\_\_\_\_

Sophomore \_\_\_\_\_

Junior \_\_\_\_\_

Senior \_\_\_\_\_

Have you previously taken a course that used clickers? Yes (1)  
No (2)

Did you use a clicker in this course? Yes (1)  
No (2)

## Computer Use

Please rate your use of computers or computer software. There are no correct answers or preferred answers. Each item is rated on a 5-point scale ranging from frequently (5) to never (1).

(5) Frequently | (4) Often | (3) Sometimes | (2) Rarely | (1) Never

1. \_\_\_ How often do you use a computer at home?
2. \_\_\_ How often do you use a computer at school?
3. \_\_\_ How often do you use a computer at work?
4. \_\_\_ How often do you use a computer in a library?
5. \_\_\_ How often do you use a computer at a friend or family member's house?
6. \_\_\_ How often do you use a computer?
7. \_\_\_ How often do you use the Internet?
8. \_\_\_ How often do you use send or receive electronic mail?
9. \_\_\_ How often do you use chat software/instant messenger (AOL, MSN, ICQ, etc.)?
10. \_\_\_ How often do you use a word processor (Word, WordPerfect)?
11. \_\_\_ How often do you use spreadsheets (Excel, Lotus)?
12. \_\_\_ How often do you use the computer for games?
13. \_\_\_ How often do you use the computer to view or edit graphics/photo images?
14. \_\_\_ How often do you use a courseware product (e.g., Desire2Learn, D2L)?

## Student Response System Evaluation: Student Survey Items

The following statements address different aspects of your experience in taking a course that uses a student response system or clickers. For each of the statements, please enter 5 if you strongly agree with the statement with a range to 1 if you strongly disagree with the statement.

(5) Strongly Agree | (4) Agree | (3) Neutral | (2) Disagree | (1) Strongly Disagree

|                                                                        |
|------------------------------------------------------------------------|
| Clickers made me feel involved in the course.                          |
| Using clickers helped me pay attention in class                        |
| Clickers allow me to better understand concepts                        |
| Using the clickers did not help me score higher on the exams           |
| The clicker was too expensive for what I got out of it                 |
| I would recommend that the instructor continue to use clickers         |
| Clickers did not stimulate interaction with my classmates              |
| Clickers helped me get instant feedback on what I knew and didn't know |
| The clickers used in this course motivated me to learn                 |
| The clickers made it easy to connect ideas together                    |
| The clickers did not increase my participation in class                |

## Open-ended Questions

What did you like best about your experience using clickers in this class?

What were some barriers to your use of clickers in this class?

What is one thing you would improve about your experience?

Would you recommend this course to others, if it used the same technology? Why or Why not?
